# Supplementary material
Source: PubMed Central journal article supplement (PMC4654061)
Supplement: supp_ddv410_ddv410supp.pdf [file supp_ddv410_ddv410supp.pdf]

## **Supplementary Material**

### **Figure S1: Archimedes spiral test of patient 3**

Archimedes spirals of patient 3 are shown. L represents the non-dominant left hand, and R represents the dominant right hand. The spirals were drawn on paper.

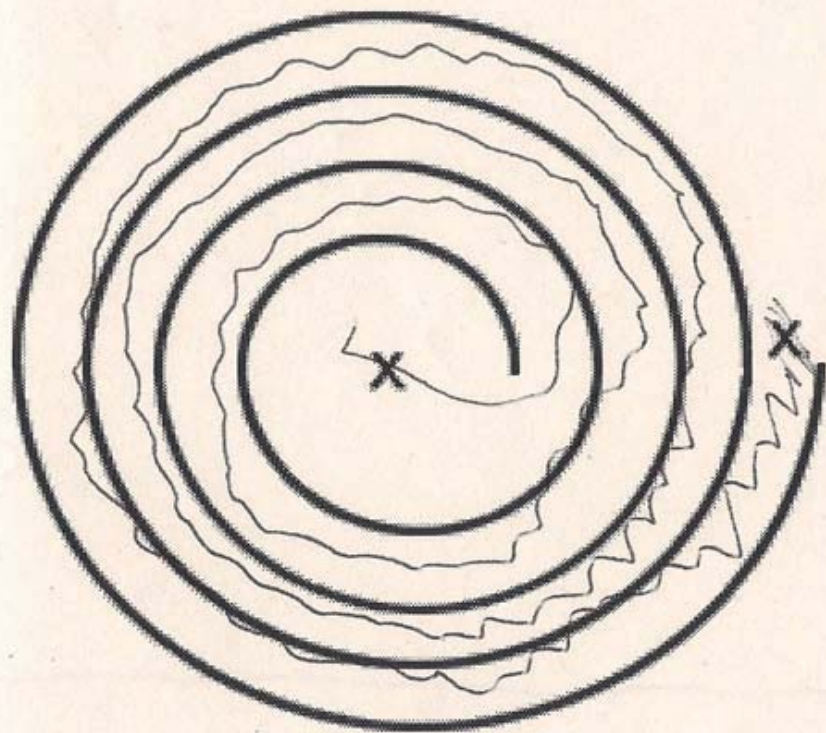

L

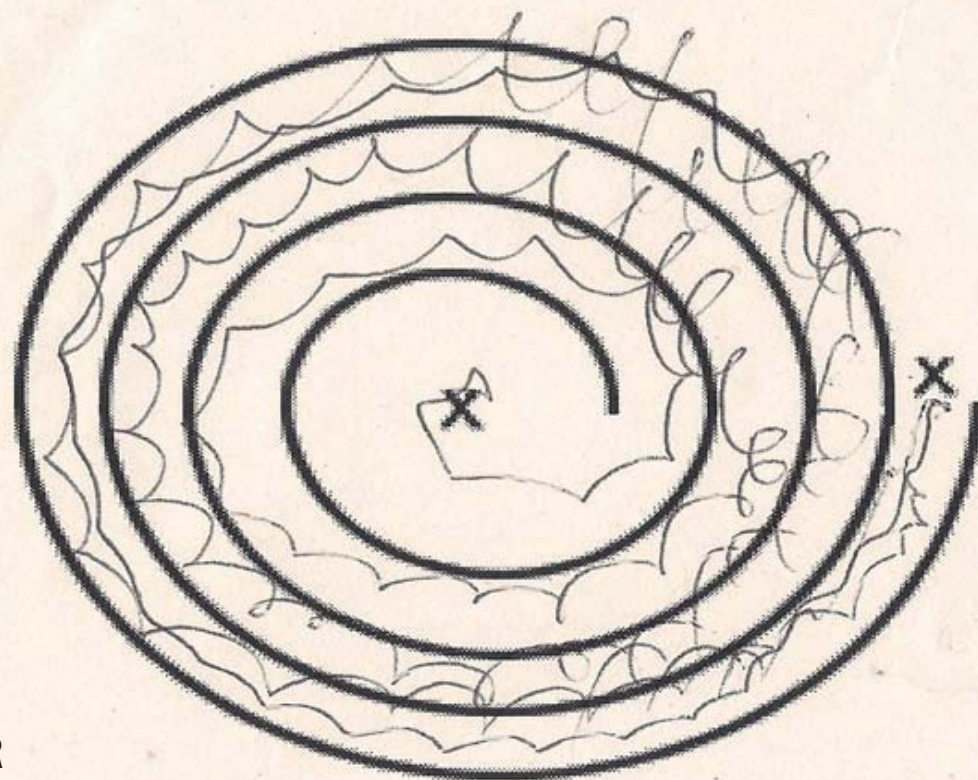

R

**Supplementary Table S1:** Primer sequences used in RT-PCR analyses

| <b>Primer name</b>                      | <b>Forward Primer (5'-3')</b> | <b>Reverse Primer (5'-3')</b> |
|-----------------------------------------|-------------------------------|-------------------------------|
| <b><math>\beta</math>-actin (mouse)</b> | CAGAGCAAGAGA GGTATCCTG        | GTTGCCAATAGTGATGACCTG         |
| <b>SCN2A (mouse)</b>                    | GTTTCAGCAGATGCTGGAGC          | GCATGGAGGGCATTCTGTC           |
| <b>SCN4A (mouse)</b>                    | TCACCCACACTGTTCCGTGT          | CAATGTCGGGTCACAGTCTG          |
| <b>SCN1A (human)</b>                    | TGTCTCGGCATTGAGAACATTC        | ATTGGTGGGAGGCCATTGTAT         |
| <b>SCN2A (human)</b>                    | TCTAAGCGTGTTTGCGCTAAT         | ACCATTCCCATCCAATGAATTGT       |
| <b>SCN4A (human)</b>                    | TTCACAGGGATCTACACCTTTGA       | CACAAACTCTGTCAGGTACGC         |
